# Supplementary material
Source: PubMed Central journal article supplement (PMC3509343)
Supplement: NIHMS422467-supplement-supplemental_material.pdf [file NIHMS422467-supplement-supplemental_material.pdf]

## **Supplemental Information**

### **LincRNA-p21 Suppresses Target mRNA Translation**

**Je-Hyun Yoon, Kotb Abdelmohsen, Subramanya Srikantan,  
Xiaoling Yang, Jennifer L. Martindale, Supriyo De, Maite Huarte,  
Ming Zhan, Kevin G. Becker, and Myriam Gorospe**

#### **INVENTORY of SUPPLEMENTAL INFORMATION**

##### **Supplemental text**

**Figure S1: Complements main Figure 1**

**Figure S2: Complements main Figure 1**

**Figure S3: Complements main Figure 2**

**Figure S4: Complements main Figures 3 and 4**

**Legends of Supplemental Figures**

**Table S1**

**Table S2**

## Supplemental text

### Human lincRNA-p21 partial sequence (1956 nt)

**Exon 1:** Human lincRNA-p21: hg19\_dna range=chr6:36635073-36634046'pad=0 3'pad=0 strand=-  
**Intron 1:** Human lincRNA-p21: hg19\_dna range=chr6:36634045-36633250'pad=0 3'pad=0 strand=-  
**Exon 2:** Human lincRNA-p21: hg19\_dna range=chr6:36633249-36632321'pad=0 3'pad=0 strand=-

GGCCGGCAGAGCTCCCCTGGCCCTGCCCGGGCTTGTCTTTTGTTCATTGTTGCATCATCATGCGGCCCTGCAGGGTGCCAG  
AAGAGTGAGCCACCCACTCACCCTGGAAGAAAACAGCTAATTATATCACCAAGAGACCCAGGCATATGGTCACCTCTCAGCT  
GGCCAGCCTGTTTCTACTTGCCTTTCATGATTGTTCTGGATTTTTCAAATAATAAATAACTACCAACCAGGAAAAAAAAA  
TCACCCCTGACTGTGGAGCGTGCCTGCTGAAGTAGGAGCTTTAGTCTACCTGCTGCTCTAGGAGAGACCTACACAGCCCCCTGA  
GCTCAGAAAACAAAAGCCAGACTCCCAGACTAGGGTTCATAGACAAGTGGCTCTGAGAACAGGATACACTGGAATCAGCAG  
AATCCAAAAGACAAGCATTGCTTTGACAGCATCACAGTAATTTATTTTTTCCAAAATCTTTAAAATTCTATTTGTAGTTTAGT  
CAAAAGTGCAGAGCGTTTTGTTTGTCCATAGTTTCCGTATTTATTTTTTTCAGTAGATAATACATTCACATGGTCCACAGTCA  
AAAGATGCAAAAGGCTATTCAGTGAAAACCTCCCTCCACCCCTACCCCTCCAGCTACCCATTTTTCTCCAGAGGCTGTGGC  
TGGTGGCTTGTGTCCCCTTCCACAGATAGTCTAAGAACATCCAGGTCCTTCAGCTGAAACCCCTGGGCACAGATGGGTTGCA  
GAATCTAGAACTTTTCCATTTTAGACAGGTAATAAAGTGCATACAGCTGTATTTCCACAACACCAGCGGCTCCGCCAGGG  
TGAGCAGTCAGCCAGTTTGGCCAGACTGTTCCAGTTCATGTCCAGGGAACCCCTTCAATCCCAGGCAAACCAAGCAGTAG  
GTCCTGCTAGCTGTGggctgtaatgtattcacactaacagggacaattaaactgcaaatggcttcacatccttttagctct  
ggttttgctaccaataaaatttgcacaaaccaaagaaaaaagttttggttccagagccttttggatttgggaattgtggat  
gaggggctggggacctatacacaatatacatatataattttaactctgctgtaatggaaacacagtggtgggcacattgtttt  
gcactcaatttatcttagtggctttccacatcagtagacatagaaatcctgccccttcccttttactgctgcattggacttcaac  
acacgggtgaacatttaggatgtctctagttttctgttattacaacacacatagttttacaagcagctaacacatggggag  
ggggcagaggaggaatggaatcattcttttttttttttttttttttttttttttttttttttttttttttttttttttttt  
gggtgcaacttggctcactgcagcctccacctcccaggctcaagcaattctcctgcccagcctcccagtagctgggattac  
agggtctgctatcacaccagctaaagtttttatatttttagtagaaatggagtttcaccatgttggacaggctggctcga  
actcctgacctcaggtgatccaccgcctcagcctcccaaagtgtctgggattacaggcatgagccactgtaccagccagggg  
tcttcattcctaagtgtttgtttatgactgaaagtttatgtccaagcctgctcagaagttgcggggCAGAAACAAGACCTACTG  
AGGTCCTCCAGACCAGCTGCCCGCCATCCACCTACATCACGAAGAGTCACTCCCAATTCAGAAATGATTTTTTCCAAACAAGAA  
GACAACTTACATTCAGACCTACTGTATTAGTTCGGGGTCTCCAGAGAAACAGAACCAATACAAGAATATATTCAGATAGATAT  
AGACATAGATAGATAGATAGATAGATAGATAGATAGATAGATAGATAGATAGATAATGTTTCTCAATTTTATGATA  
AAGTAAAAAATTTATAAGCTGAACCATCATAAGTCAGAGACTATCTATATATCTATATACAGGCCTCATGTGGGCAAAAAATAC  
CACCCAGGGTGGGTCTCTGGTGACCAGATCCAGTTAATGAAAGGGGCTAGATTTTCAGCTGATGGGGCCGTGAAAATCTGAATT  
GGGAGCCCCCTTCCATAAAACCAAGAGAAGATCCATCCATGTGTGGTGGGGCTGAAGTTTATGCAATGATAGAGGCCCTTCTCA  
CGATAAAGAAGGCAATTATAAATACTAGGCACCCCTATGCAAATGAGAGTCCTAGAAGCCTCCTTTCATCGGTTTCACCATCAA  
CCCACCTGTGTGTGTGGCTGAATAAAGATCAGGGAAGTAGCGGTCTCTGGGGGGCAGATGTGACACCTGGGGGGCCACAGTTC  
TAAAACCTGAAGGACCAGAATAAACCAGCTGAAGGAGGACACAGGAGAGGCAAGATAGAGAGAAATGGGGCCATCCTGCAG  
TGCCACCACAACCCTCTATGCATCCTGGACCCAGGCTGGCACTATACAGGGTGTGTGTGATTCTCACCCCTCAATCTCTG  
CCTCCACCAAGAGTAATAGGCTGGGCGTGGTGGCTCACGCCGTGAATCCCACCCTTTGGGAGGCCGAGGCAGGCGGATCACT  
TGAGGTCAGGAGTCCAAGACCAGCCTGGCCAACAAGGCGAAACCCCTGTCTCTACTAAAAATACAAAACCTAGCTGGGCGTAGT  
GGTGGGCACCTGTA

Rapid Amplification of cDNA Ends (RACE) was performed according to manufacturer's protocol (Invitrogen) using total RNA from HeLa cells.

**A**

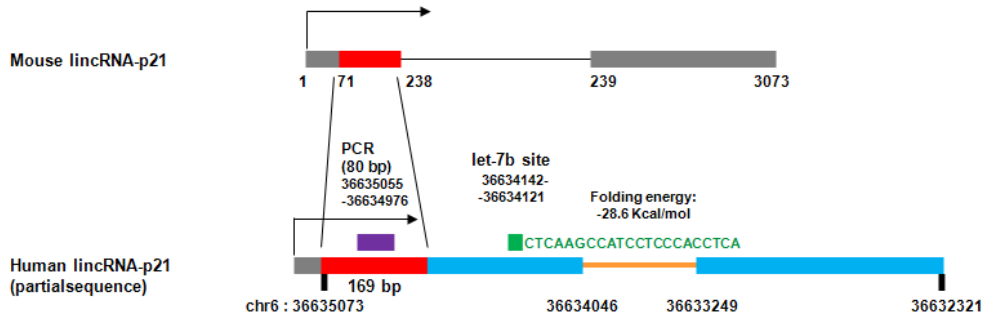

**B**

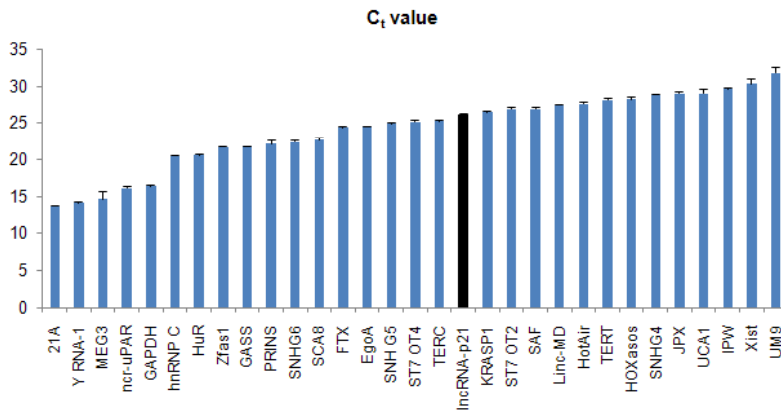

**C**

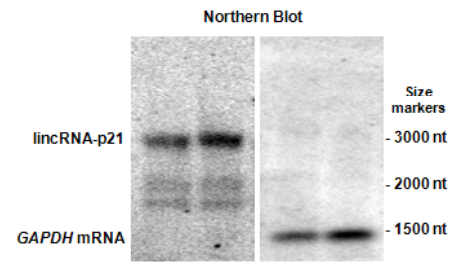

**D**

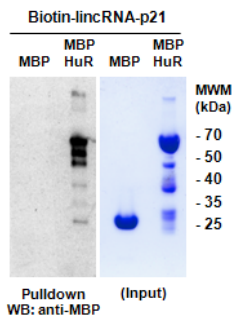

**E**

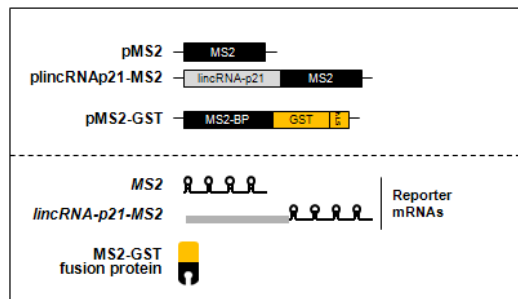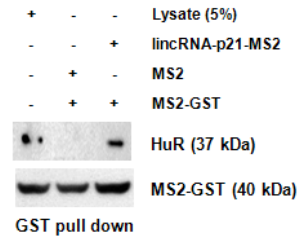

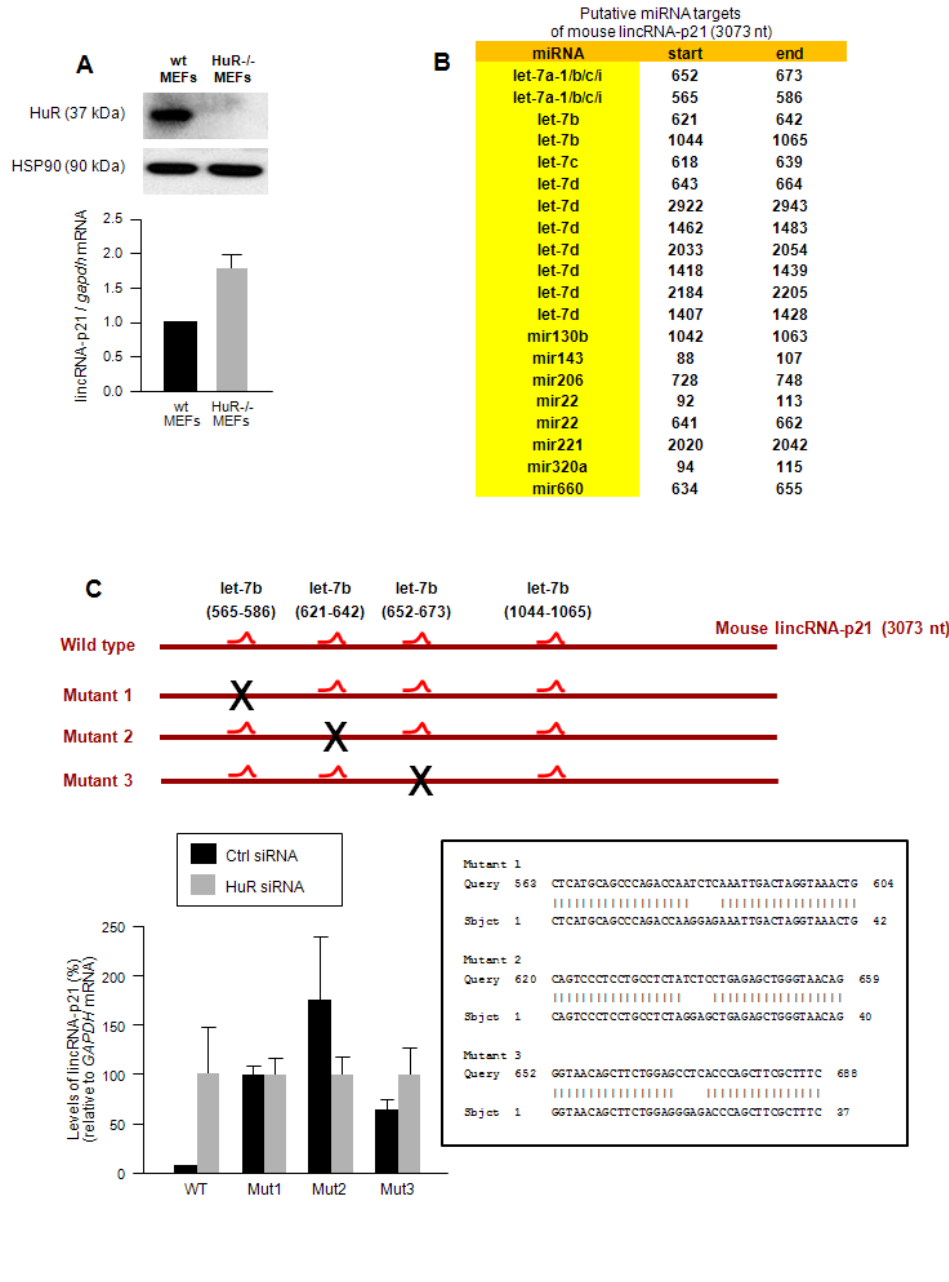

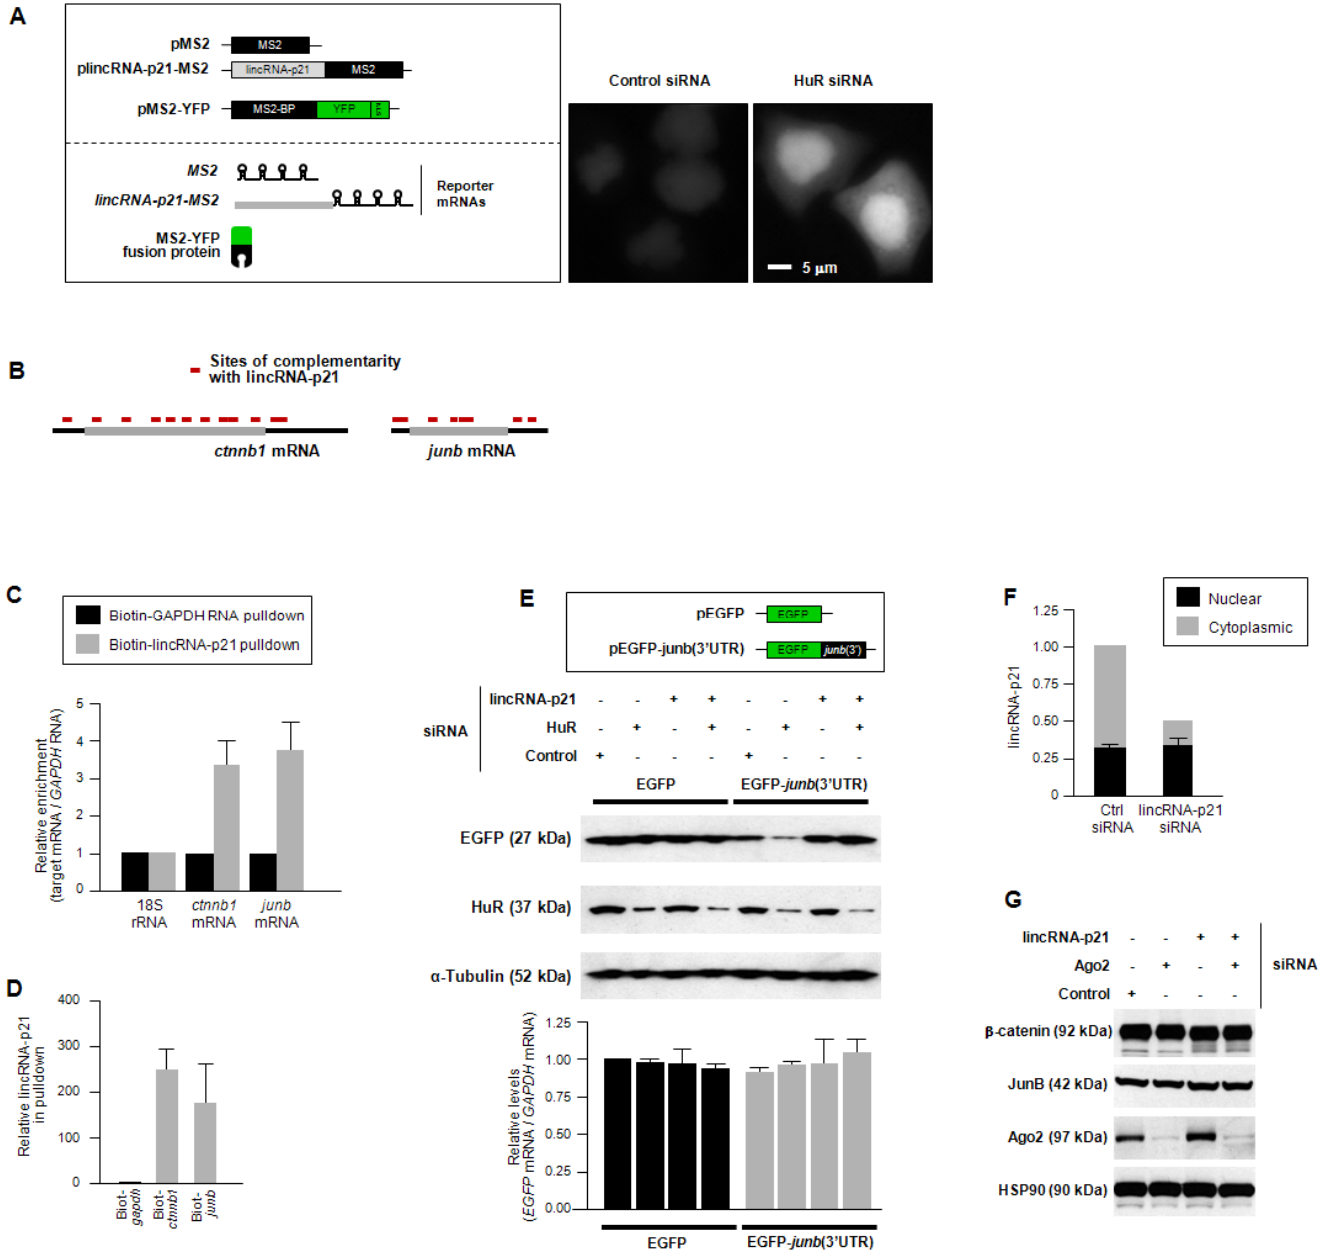

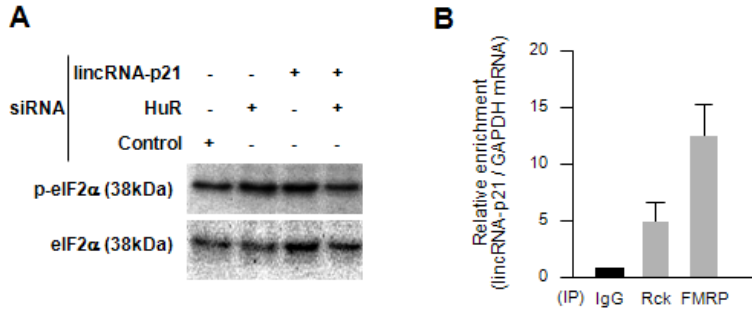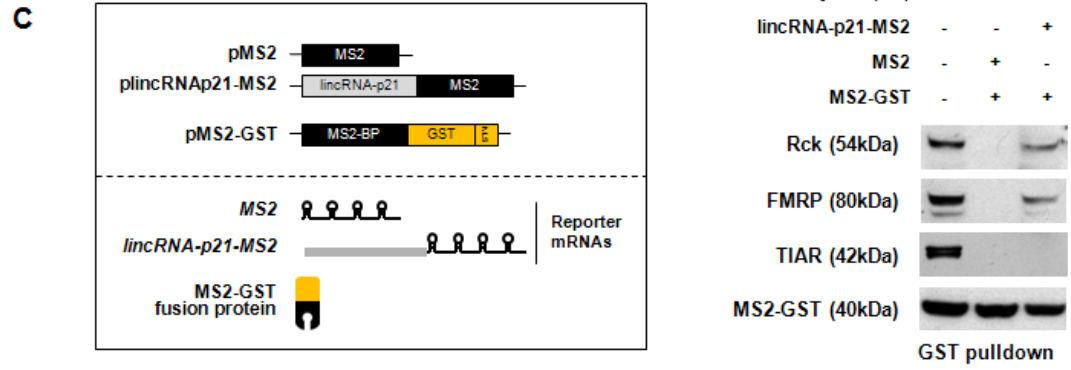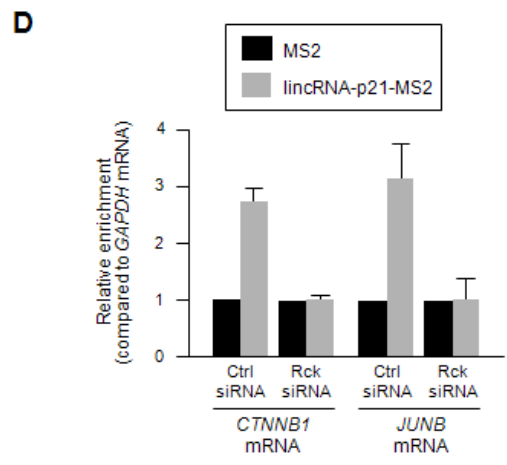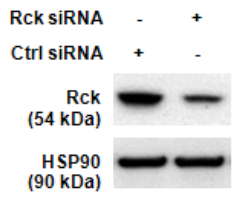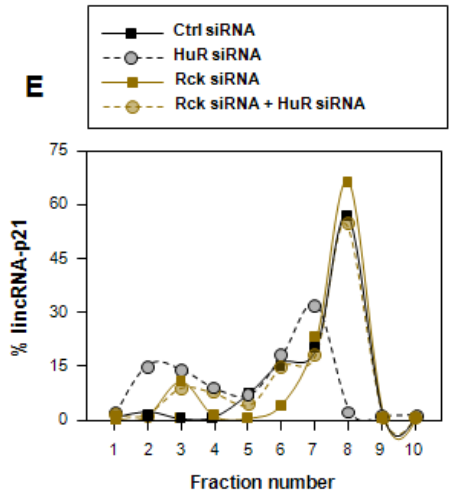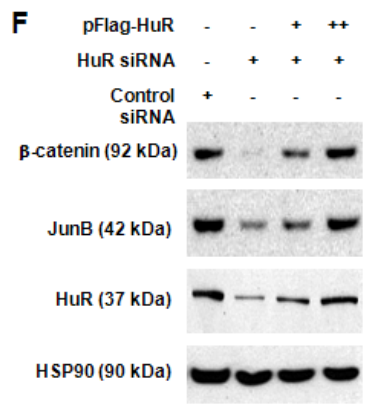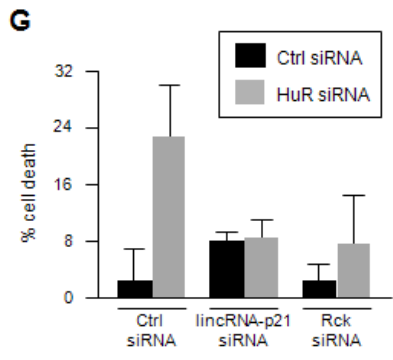

## Legends of Supplemental Figures

### Figure S1 (complements Fig. 1). Additional characterization of mouse and human lincRNA-p21 and their interaction with HuR.

(A) Genomic localization of mouse (*top*) and human (*bottom*) lincRNA-p21. The human lincRNA-p21 was sequenced partially by RACE (Rapid Amplification of cDNA Ends; Invitrogen) using total RNA from HeLa cells (supplemental text). *Red*, region of homology between mouse and human lincRNA-p21. *Purple*, region used to detect human lincRNA-p21 by qPCR. *Green*, let-7b site, with the interaction sequence indicated in green text. (B) Relative abundance of lincRNA-p21 (black) as determined by calculating  $C_t$  values among a subset of mRNAs (those encoding hnRNPC and HuR) and lincRNAs, as measured in HeLa cells. (C) Northern blot analysis of lincRNA-p21 expression in HeLa cells. Duplicate samples (20 and 30  $\mu$ g of total RNA) were run in agarose/formaldehyde gels; after transfer to nylon membranes, lincRNA-p21 and *GAPDH* mRNA were detected using antisense oligomers (GGGTGGCTCACTCTTCTGGC and GCCAATACGACCAAATCC respectively) that were end-labeled with  $^{32}$ P and used as probes. Bands were visualized using a Typhoon scanner (GE Healthcare). (D) *In vitro* interaction of maltose-binding protein (MBP) or MBP-HuR (2  $\mu$ g each) with biotinylated lincRNA-p21 was assessed by pull-down using streptavidin-coated beads and Western blotting (WB) detection using anti-MBP antibody. Input, 2  $\mu$ g recombinant protein. As shown, MBP-HuR selectively interacted with biotinylated mouse lincRNA-p21, while MBP did not. MWM, protein molecular weight markers. (E) HeLa cells were transfected with the plasmids shown in the schematic (*left*). Forty-eight h later, lysates were used in IP reactions employing GSH-agarose beads. The presence of HuR in IP reactions from each transfection group (cells expressing MS2 RNA compared with cells expressing lincRNA-p21 RNA) was assessed by Western blot analysis using an anti-HuR antibody.

### Figure S2 (complements Fig. 1). Influence of HuR and let-7 on lincRNA-p21 levels.

(A) In wild-type (wt) and HuR-null (HuR<sup>-/-</sup>) MEFs, HuR levels were assessed by WB, and lincRNA-p21 by RT-qPCR. (B) Putative microRNAs interacting with mouse lincRNA-p21, as predicted using TargetScan. (C) Predicted let-7 sites on mouse lincRNA-p21. Using a plasmid vector that expressed the wild-type mouse lincRNA-p21 expressed from a CMV promoter (Huarte et al., 2010), site-directed mutagenesis (box) was used to generate the mutants indicated (Mut1, Mut2, Mut3). After transfection of each plasmid into MEFs expressing normal or silenced HuR, the levels of lincRNA-p21 (WT, Mut1, Mut2, Mut3) were quantified by RT-qPCR. Site-directed mutagenesis of mouse lincRNA-p21 was performed with the QuikChange® Site-Directed Mutagenesis Kit (Stratagene). (D) In wild-type (wt) and Ago2-null (Ago2<sup>-/-</sup>) MEFs, Ago2 levels were assessed by WB (*top*), and lincRNA-p21 by RT-qPCR (*graph*). Data in (A,C,D) represent the means and S.D. (error bars) from 3 independent experiments.

### Figure S3 (complements Fig. 2). Translational repression of $\beta$ -catenin and JunB translation by lincRNA-p21 in mouse cells.

(A) HeLa cells were transfected with the plasmids shown in the schematic. Forty-eight hours later, the localization of the MS2-tagged lincRNA-p21 was assessed by fluorescence microscopy. (B) Regions of predicted interaction between mouse lincRNA-p21 and mouse *ctnmb1* and *junb* mRNAs. (C) Following incubation of mouse biotin-lincRNA-p21 (or control biotin-*GAPDH* RNA) with MEF lysates, RNA was extracted and *ctnmb1* and *junb* mRNAs, as well as normalization control 18S rRNA were assessed by RT-qPCR and represented as fold difference relative to mRNA levels in biotin-*GAPDH* pull-down samples. (D) Biotinylated *GAPDH* mRNA, *ctnmb1* RNA (NM\_007614.3, nucleotides 288-2633), and *junb* RNA (NM\_008416.3, nucleotides 320-1354) were incubated with MEF lysates; after pull-down, the levels of lincRNA-p21 in beads were assessed by RT-qPCR. (E) MEFs were transfected with the plasmids indicated: pEGFP-*junb*(3'UTR), containing the entire mouse *junb* 3'UTR (amplified from mouse total RNA and cloned into pEGFP-C1), and control plasmid pEGFP, together with the siRNAs shown. Forty-eight h later, the levels of the reporter protein EGFP were detected by Western blot analysis and the levels of *EGFP* or *EGFP*-

*junb*(3'UTR) mRNAs by RT-qPCR analysis. (F) Forty-eight hours after siRNA transfection in HeLa cells, lincRNA-p21 levels were assessed by RT-qPCR in nuclear and cytoplasmic fractions as explained in main Fig. 2A. (G) Forty-eight hours after transfection with the siRNAs shown, the levels of Ago2,  $\beta$ -catenin, JunB and loading control HSP90 were assessed by Western blot analysis. Data in (C-F) represent the means and S.D. (error bars) from 3 independent experiments. Oligomer sequences are in Table 2.

**Microscopy:** forty-eight h after transfection of pMS2-YFP together with either pMS2 or pMS2-lincRNA-p21, HeLa cells were fixed and images were acquired with Axio Observer microscope (ZEISS) with Axio Vision 4.7 Zeiss image-processing software or with LSM 510 Meta (ZEISS).

**Figure S4 (complements Figs. 3 and 4). Translational inhibition by mouse lincRNA-p21 associated to the recruitment of translational repressor Rck.**

(A) HeLa cells were transfected with the siRNAs shown and 48 h later, the levels of eIF2 $\alpha$  and phospho-eIF2 $\alpha$  were assessed by Western blot analysis. (B) RIP analysis of lincRNA-p21 interaction with Rck and FMRP in MEFs. (C) *Left*, plasmids used to study the *in vitro* interaction of lincRNA-p21 with Rck, FMRP, and TIAR present in HeLa cell lysates, as detected by WB analysis in GST pulldown assays (*right*). (D) Mouse lincRNA-p21-MS2 and MS2-GST were expressed in HeLa cells using the plasmids shown in panel (C) in cells expressing normal Rck levels or cells in which Rck was silenced (*right*). RIP analysis was carried out to study if silencing Rck affected the interaction of lincRNA-p21 with endogenous *CTNNB1* and *JUNB* mRNAs. (E) 48 h after transfecting HeLa cells with the siRNAs shown, polysomes were prepared as shown in the main Fig. 4E; the relative distribution of lincRNA-p21 is indicated. (F) In order to establish whether the effects of lincRNA-p21 were directly attributed to HuR, a rescue experiment was devised in which HeLa cells were transfected with siRNA directed to the 3'UTR of HuR or with a plasmid (1 and 2  $\mu$ g) to express only the coding region of HuR (pFlag-HuR). Forty-eight h later, the levels of  $\beta$ -catenin and JunB were assessed by Western blot analysis. (G) Percentages of HeLa cell death (as assessed by trypan blue exclusion) 48 h after transfection of the siRNAs shown; cell number and viability were quantified using a TC10 automated cell counter (BioRad). Data in (B,D,G) represent the means and S.D. (error bars) from 3 independent experiments.



**Table S1. Putative Regions of interaction of lincRNA-p21 with human *CTNNB1* mRNA, *JUNB* mRNA, and (control) *GAPDH* mRNA.**

I. Putative interaction regions of the *CTNNB* mRNA (query) with lincRNA-p21 (subject).

| Matched sequence |                                         | Identity (%) | Mach Size (bp) | E-value |
|------------------|-----------------------------------------|--------------|----------------|---------|
| Query 3295       | TTTTTAA--GTCTCTCGTAGTGTAA 3318          | 76.92        | 26             | 54      |
| Sbjct 966        | TTTTTAATTGTCCCTGTTAGTGTGAA 941 (intron) |              |                |         |
| Query 3441       | TTTTGTATAAAATAGACAAATAGAA 3465          | 80           | 25             | 4.4     |
| Sbjct 503        | TTTTGACTAAACTA--CAAATAGAA 481           |              |                |         |
| Query 879        | ATACAAATGATGTAGAAACAG 899               | 80.95        | 21             | 4.4     |
| Sbjct 195        | ATGCAAAAGCAAGTAGAAACAG 175              |              |                |         |
| Query 3511       | TGGATCTATTTCATGTTTT 3530                | 80           | 20             | 189     |
| Sbjct 2192       | TGGATCT-TCTCTGGTTTT 2174                |              |                |         |
| Query 1353       | GAATGCAAGCTT-TAGGACT 1371               | 80           | 20             | 189     |
| Sbjct 2307       | GAAAGGAGGCTTCTAGGACT 2288               |              |                |         |
| Query 3339       | AGCAATTCTAATTTTTAA 3357                 | 78.95        | 19             | 54      |
| Sbjct 978        | AGCCATTGACGTTTTTAA 960 (intron)         |              |                |         |
| Query 297        | TGGACATGGCCATGGAAC 314                  | 83.33        | 18             | 15      |
| Sbjct 876        | TGGACATGGAACATGGAAC 859                 |              |                |         |
| Query 1509       | TAAATGTGGTTCACCTGTG 1526                | 83.33        | 18             | 54      |
| Sbjct 1262       | TAAATGT--TCACCCGTG 1247 (intron)        |              |                |         |
| Query 1350       | GTGGAATGCAAGCTTTA 1366                  | 82.35        | 17             | 54      |
| Sbjct 806        | GTGGAATACAGGCTGTA 790                   |              |                |         |
| Query 3060       | AAACTTTTTTGTCTGGT 3076                  | 82.35        | 17             | 54      |
| Sbjct 1042       | AAACTTTTTTCTTTGGT 1026 (intron)         |              |                |         |
| Query 2885       | CATTGCTGTTTTTAAA 2900                   | 87.5         | 16             | 4.4     |
| Sbjct 975        | CATTGACGTTTTTAA 960 (intron)            |              |                |         |
| Query 2173       | AGCCACAGCTCCTCTG 2188                   | 87.5         | 16             | 54      |
| Sbjct 665        | AGCCACAG--CCTCTG 652                    |              |                |         |
| Query 247        | TTTTGAAAA-TCCAG 260                     | 93.33        | 15             | 15      |
| Sbjct 217        | TTTTGAAAAATCCAG 203                     |              |                |         |
| Query 110        | GGGAGGCGGAGACGG 124                     | 86.67        | 15             | 15      |
| Sbjct 1615       | GGGAGGCTGAGGCGG 1601 (intron)           |              |                |         |
| Query 1812       | GAAATCTTGCCCTTT 1826                    | 86.67        | 15             | 15      |
| Sbjct 2130       | GAAATCTAGCCCTTT 2116                    |              |                |         |
| Query 2913       | CCTTCTCTCTTAT 2927                      | 86.67        | 15             | 15      |
| Sbjct 2477       | CCATTCTCTCTAT 2463                      |              |                |         |
| Query 1409       | TGTCTT-TGGACTCT 1422                    | 86.67        | 15             | 189     |
| Sbjct 428        | TGTCTTTGGATTCT 414                      |              |                |         |
| Query 383        | GCCACTA-CCACAGC 396                     | 86.67        | 15             | 189     |
| Sbjct 671        | GCCACCAGCCACAGC 657                     |              |                |         |
| Query 214        | CCCTGAG-GGTATTT 227                     | 86.67        | 15             | 189     |
| Sbjct 2084       | CCCTGGGTGATTT 2070                      |              |                |         |
| Query 1096       | TGGTGGG--GTGAG 1108                     | 86.67        | 15             | 189     |
| Sbjct 2499       | TGGTGGGCACTGAG 2485                     |              |                |         |
| Query 384        | CCACTAC-CACAGCT 397                     | 86.67        | 15             | 189     |
| Sbjct 2741       | CCACTACGCCAGCT 2727                     |              |                |         |

## II. Putative interaction regions of the *JUNB* mRNA (query) with lincRNA-p21 (subject).

| Matched Regions |                                      | Identity (%) | Mach Size (bp) | E-value |
|-----------------|--------------------------------------|--------------|----------------|---------|
| Query 770       | CCCCGGCTGGGCCCCGGGGCCCTACGCCGGCC 802 | 72.73        | 33             | 93      |
| Sbjct 32        | CCCCGGCAAGCCAGCGGGAG-CTCTGCCGGCC 1   |              |                |         |
| Query 1654      | TGGGAAGGGGAcccccccccctgcc 1679       | 80.77        | 26             | 0.18    |
| Sbjct 687       | TGGGAAGGGGACACAAGCCACCAGCC 662       |              |                |         |
| Query 1559      | AATATA-ATATAT-TTGTGTAT 1578          | 86.36        | 22             | 7.6     |
| Sbjct 1117      | AATATATATGTATATTGTGTAT 1096 (intron) |              |                |         |
| Query 956       | CGGCCGAGCTGGGCTTGG 973               | 83.33        | 18             | 7.6     |
| Sbjct 1767      | CGGGCAGCTGGTCTGGG 1750               |              |                |         |
| Query 1653      | TGGGAAGGGGAccccc 1669                | 82.35        | 17             | 27      |
| Sbjct 2175      | TTAGGAAGGGGCTCCC 2159                |              |                |         |
| Query 11        | GCCAGCCTCGGAGCCAG 27                 | 82.35        | 17             | 27      |
| Sbjct 2532      | GCCAGCCTGGGGTCCAG 2516               |              |                |         |
| Query 1564      | AATATATTTGTGTATT 1579                | 87.5         | 16             | 2.2     |
| Sbjct 1117      | AATATATATGTATATT 1102 (intron)       |              |                |         |
| Query 1564      | AATATATTTGTGTATT 1579                | 87.5         | 16             | 2.2     |
| Sbjct 1898      | AATATATTCCTTGTATT 1883               |              |                |         |
| Query 1053      | CCCCATCA-ACATGGA 1067                | 87.5         | 16             | 27      |
| Sbjct 2208      | CCCCACCACACATGGA 2193                |              |                |         |
| Query 1443      | TGGACTCCGGCCCTC 1457                 | 86.67        | 15             | 7.6     |
| Sbjct 2672      | TGGACTCTGACCTC 2658                  |              |                |         |

## III. Putative interaction regions of the *GAPDH* mRNA (query) with lincRNA-p21 (subject).

| Matched Regions |                               | Identity (%) | Mach Size (bp) | E-value |
|-----------------|-------------------------------|--------------|----------------|---------|
| Query 431       | CTCATTTCAGGGGGAGCC 450        | 85.00        | 20             | 0.44    |
| Sbjct 2287      | CTCATTTCATAGGGGTGCC 2268      |              |                |         |
| Query 98        | ACACCATGGGGAAGG 112           | 86.67        | 15             | 5.4     |
| Sbjct 1316      | ACAACATGGGGAGGG 1330 (intron) |              |                |         |
| Query 506       | TGAACCATGAGAAGT 520           | 86.67        | 15             | 5.4     |
| Sbjct 2012      | TGAACCATCATAAGT 2026          |              |                |         |
